# Supplementary material for: Enhanced photocatalytic performance over PANI/NH2-MIL-101(Fe) with tight interfacial contact
Source: Royal Society of Chemistry journal article supplement (doi:10.1039/d2dt01680j), 2022-01-01
Supplement: d2dt01680j1.pdf [file d2dt01680j1.pdf]

## **Enhanced photocatalytic performance over PANI /NH<sub>2</sub>- MIL-101(Fe) with tight interfacial contact**

Huaizhi Yang, ‡<sup>a</sup> Yuqi Wan,<sup>a</sup> Qingrong Cheng,<sup>\*a</sup> Hong Zhou,<sup>a</sup> Zhiqian Pan<sup>a</sup>

<sup>a</sup> School of Chemistry and Environmental Engineering, Wuhan Institute of Technology, Wuhan, 430205, PR China.

Corresponding authors:

\*(Q.C.) E-mail: [chengqr383121@sina.com](mailto:chengqr383121@sina.com)

‡These authors contributed equally to this work.

**Total number of pages: 6**

**Total number of Tables: 2**

**Total number of Figures: 6**

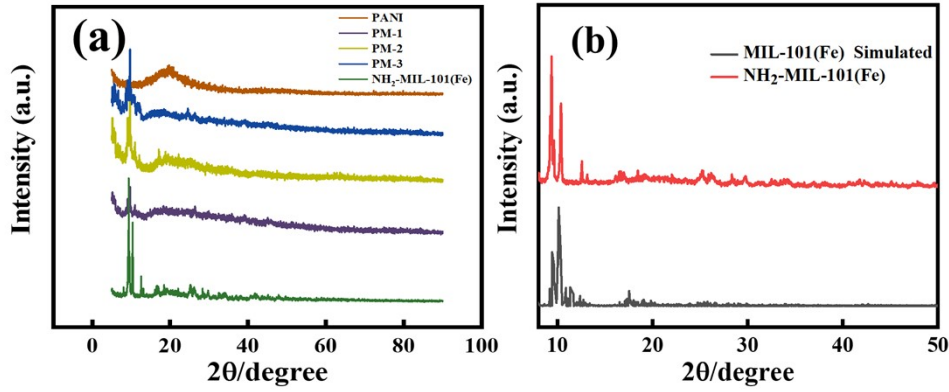

**Fig.S1** (a)XRD patterns of all samples, (b) Comparison of NH<sub>2</sub>-MIL-101(Fe) and its standard spectrum

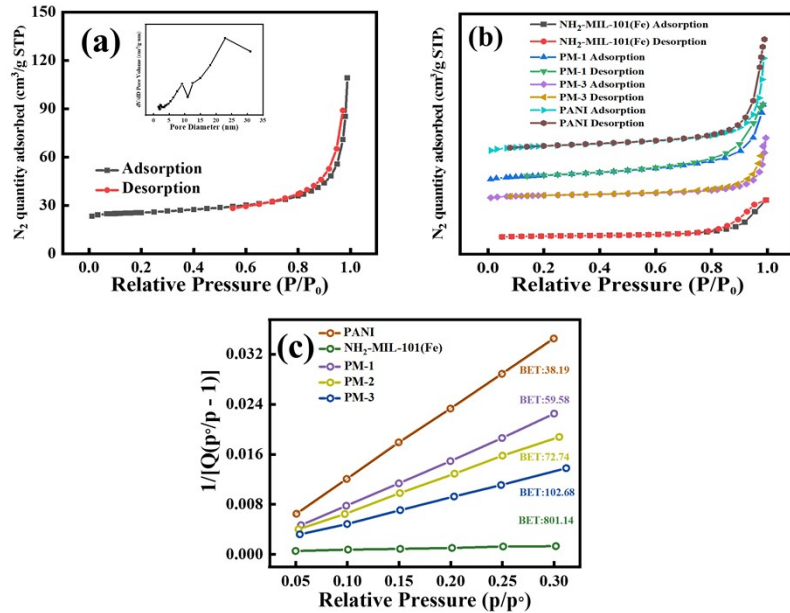

**Fig.S2** (a) N<sub>2</sub> adsorption isotherms of the PM-2; the pore size distribution graph is given in the inset, (b) N<sub>2</sub> adsorption isotherms of the other remaining materials, (c) BET for all samples.

The average pore sizes of PANI, PM-1, PM-3, and NH<sub>2</sub>-MIL-101(Fe) are 36.96, 23.05, 15.37 4.31 nm, respectively

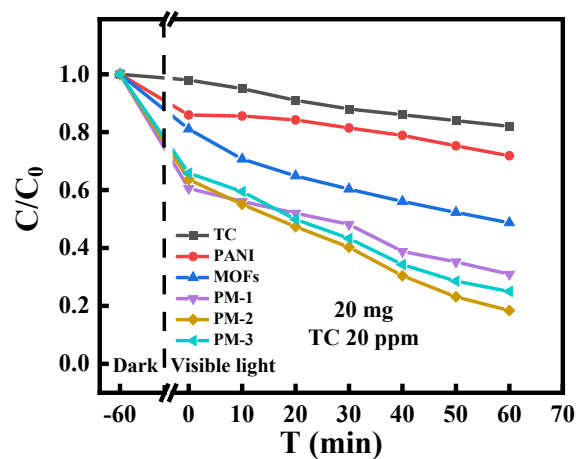

**Fig.S3** The photocatalytic efficiencies of all materials under visible light.

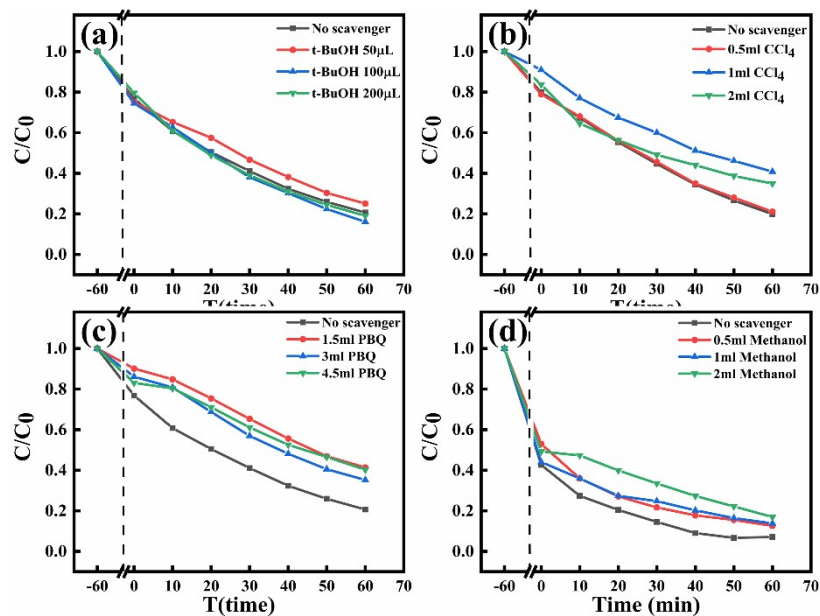

**Fig.S4** The radical trapping test for the PM-2.

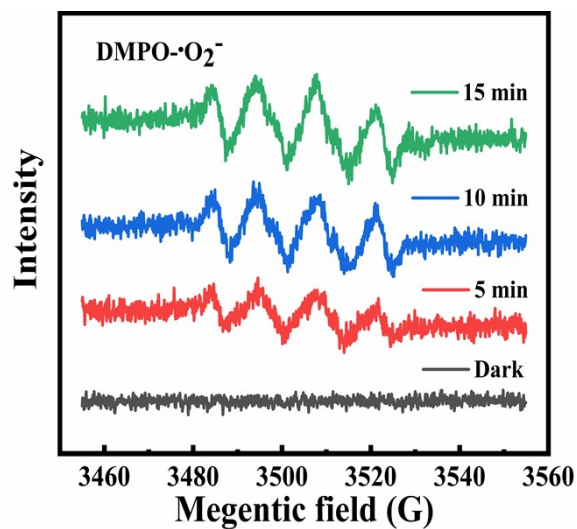

Fig.S5 The ESR spectrum of PM-2 for DMPO-•O<sub>2</sub><sup>-</sup>.

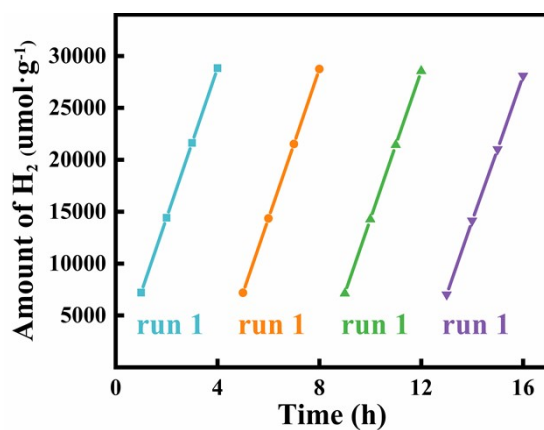

Fig.S6 Stability test of PM-2 for photocatalytic H<sub>2</sub> production activity.

Table S1 Comparison of TC degradation over PM-2 and other photocatalysts.

| <i>Catalyst / mg</i>                                    | <i>V (mL) / C<sub>0</sub> (mg·L<sup>-1</sup>)</i> | <i>Light source</i> | <i>Time (min)</i> | <i>Result (%)</i> | <i>TOF</i> | <i>Ref.</i>  |
|---------------------------------------------------------|---------------------------------------------------|---------------------|-------------------|-------------------|------------|--------------|
| PM-2/20                                                 | 50/20                                             | Sun light           | 60                | 90%               | 75         | This work    |
| PANI/PDI/25                                             | 50/20                                             | Visible light       | 120               | 70%               | 23.3       | <sup>1</sup> |
| PANI/Bi <sub>4</sub> O <sub>5</sub> Br <sub>2</sub> /20 | 50/20                                             | Visible light       | 20                | 75.3%             | 188.3      | <sup>2</sup> |

|                                                |         |               |    |       |       |   |
|------------------------------------------------|---------|---------------|----|-------|-------|---|
| PANI/AgFeO <sub>2</sub> /30                    | 50/20   | Visible light | 60 | 91.8% | 51    | 3 |
| RP/MIL-101(Fe)/50                              | 50/100  | Sun light     | 60 | 90.1% | 150.2 | 4 |
| In <sub>2</sub> S <sub>3</sub> /MIL-100(Fe)/30 | 10/ 100 | Visible light | 90 | 88%   | 32.6  | 5 |
| In <sub>2</sub> S <sub>3</sub> @MIL-125(Ti)/30 | 46/100  | Visible light | 60 | 63.3% | 48.3  | 6 |

TOF is calculated according to an equation:  $TOF = \frac{C_0 \times V_{TC} \times \text{Degradation rate}}{m_{\text{catalyst}} \times t}$

**Table S2** Comparison of the photocatalytic H<sub>2</sub> evolution rates over different photocatalysts.

| <i>Photocatalysts</i>                      | <i>Irrigation</i> | <i>Sacrificial agents</i>                            | <i>Activity</i><br>$\mu\text{mol}\cdot\text{g}^{-1}\text{h}^{-1}$ | <i>Ref</i> |
|--------------------------------------------|-------------------|------------------------------------------------------|-------------------------------------------------------------------|------------|
| PM-2                                       | Visible light     | TEOA                                                 | 7040.2                                                            | This work  |
| g-C <sub>3</sub> N <sub>4</sub> /PANI      | Sun light         | TEOA                                                 | 163.2                                                             | 7          |
| Cu/BN@PANI                                 | Sun light         | lactic acid                                          | 3121                                                              | 8          |
| UiO-66-PANI-Co <sub>3</sub> O <sub>4</sub> | Visible light     | TEOA                                                 | 710                                                               | 9          |
| NH <sub>2</sub> -MIL-125(Ti)/B-CTF-1       | Visible light     | TEOA                                                 | 360                                                               | 10         |
| MIL-101-CH <sub>2</sub> @1                 | Visible light     | TEOA                                                 | 1500                                                              | 11         |
| Au@CdS/MIL-101                             | Visible light     | Na <sub>2</sub> S<br>Na <sub>2</sub> SO <sub>3</sub> | 25000                                                             | 12         |

## References

1. W. Dai, L. Jiang, J. Wang, Y. Pu, Y. Zhu, Y. Wang and B. Xiao, *Chem. Eng. J.*, 2020, 397.
2. Y. Xu, Y. Ma, H. Ji, S. Huang, M. Xie, Y. Zhao, H. Xu and H. Li, *J. Colloid Interface Sci.*, 2019, 537, 101-111.
3. S. Chen, D. Huang, G. Zeng, X. Gong, W. Xue, J. Li, Y. Yang, C. Zhou, Z. Li, X. Yan, T. Li and Q. Zhang, *Chem. Eng. J.*, 2019, 370, 1087-1100.
4. X. Lei, J. Wang, Y. Shi, W. Yao, Q. Wu, Q. Wu and R. Zou, *Appl. Surf. Sci.*, 2020, 528, 146963.
5. Y. He, W. Dong, X. Li, D. Wang, Q. Yang, P. Deng and J. Huang, *J. Colloid Interface Sci.*, 2020, 574, 364-376.
6. H. Wang, X. Yuan, Y. Wu, G. Zeng, H. Dong, X. Chen, L. Leng, Z. Wu and L. Peng, *Appl. Catal., B*, 2016, 186, 19-29.
7. C. Yu, L. Tan, S. Shen, M. Fang, L. Yang, X. Fu, S. Dong and J. Sun, *J Environ Sci (China)*, 2021, 104, 317-325.

8. S. Sk, A. Tiwari, B. M. Abraham, N. Manwar, V. Perupogu and U. Pal, *Int. J. Hydrogen Energy*, 2021, 46, 27394-27408.
9. A. K. Singh, S. Gonuguntla, B. Mahajan and U. Pal, *Chem Commun (Camb)*, 2019, 55, 14494-14497.
10. F. Li, D. Wang, Q.-J. Xing, G. Zhou, S.-S. Liu, Y. Li, L.-L. Zheng, P. Ye and J.-P. Zou, *Appl. Catal., B*, 2019, 243, 621-628.
11. S. Roy, A. Bhunia, N. Schuth, M. Haumann and S. Ott, *Sustain Energy Fuels*, 2018, 2, 1148-1152.
12. Y. Wang, Y. Zhang, Z. Jiang, G. Jiang, Z. Zhao, Q. Wu, Y. Liu, Q. Xu, A. Duan and C. Xu, *Appl. Catal., B*, 2016, 185, 307-314.
